# Supplementary material for: The association between municipal pandemic response and COVID-19 contacts to emergency primary health care services: an observational study
Source: Springer Nature journal article supplement (doi:10.1186/s12913-023-09489-2), 2023-05-12
Supplement: MOESM1 [file 25352818]

Additional table: Prepandemic numbers of patient contacts and actions taken.

| Month<br>2019 | Total patient<br>contacts<br>n | Actions taken                        |                                            |
|---------------|--------------------------------|--------------------------------------|--------------------------------------------|
|               |                                | Medical consultation<br>by a GP<br>n | Telephone consultation<br>by operator<br>n |
| Jan           | 7728                           | 4321                                 | 2011                                       |
| Feb           | 7223                           | 3918                                 | 1931                                       |
| Mar           | 7416                           | 4010                                 | 2013                                       |
| Apr           | 7298                           | 3969                                 | 1942                                       |
| May           | 7395                           | 4209                                 | 1897                                       |
| Jun           | 7115                           | 3944                                 | 1844                                       |
| Jul           | 7399                           | 3953                                 | 2220                                       |
| Aug           | 6891                           | 3767                                 | 1969                                       |
| Sep           | 6971                           | 3862                                 | 1875                                       |
| Oct           | 7268                           | 3836                                 | 1971                                       |
| Nov           | 7359                           | 3914                                 | 2043                                       |
| Des           | 8764                           | 4605                                 | 2502                                       |
| <b>Total</b>  | <b>88827 (100%)</b>            | <b>48308 (54%)</b>                   | <b>24218 (27%)</b>                         |

Total numbers of patient contacts to the seven emergency primary health care services, and the number of contacts handled by medical consultation by a GP and by telephone consultation by operator, by each month in 2019.
